# Supplementary material for: Controllable synthesis of metal selenide heterostructures mediated by Ag2Se nanocrystals acting as catalysts
Source: Royal Society of Chemistry journal article supplement (doi:10.1039/c3nr03601d), 2013-01-01
Supplement: c3nr03601d.pdf [file c3nr03601d.pdf]

## Supplementary Information

### Controllable Synthesis of Metal Selenide Heterostructures Mediated by $\text{Ag}_2\text{Se}$ Nanocrystals Acting as Catalysts

Jiangcong Zhou, Feng Huang\*, Ju Xu and Yuansheng Wang\*

State Key Laboratory of Structural Chemistry, Fujian Institute of Research on the Structure of Matter, Chinese Academy of Sciences, Fuzhou, Fujian, 350002 (P. R. China)

\* Address correspondence to E-mail: [yswang@fjirsm.ac.cn](mailto:yswang@fjirsm.ac.cn); [fengh@fjirsm.ac.cn](mailto:fengh@fjirsm.ac.cn).

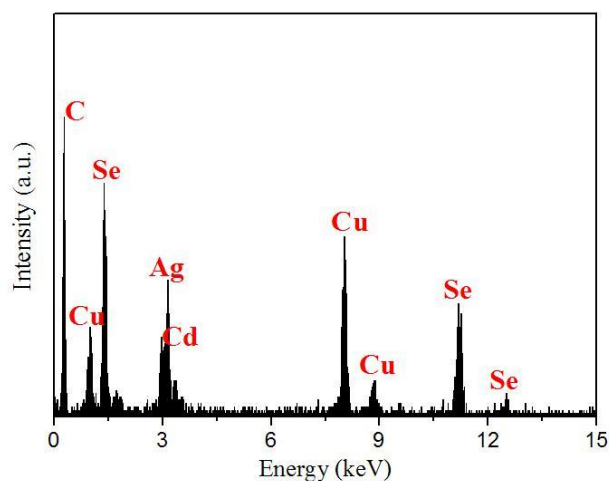

**Figure S1.** EDS spectrum of the  $\text{Ag}_2\text{Se}$  tip area of an individual  $\text{Ag}_2\text{Se}$ -CdSe nanoheterostructure, showing the existence of Ag, Cd and Se.

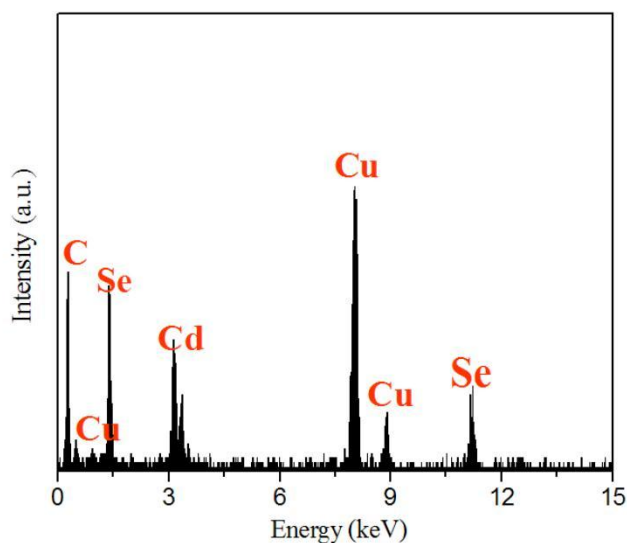

**Figure S2.** EDS spectrum of the CdSe segment of an individual  $\text{Ag}_2\text{Se}$ -CdSe nanoheterostructure, showing the existence of Cd and Se.

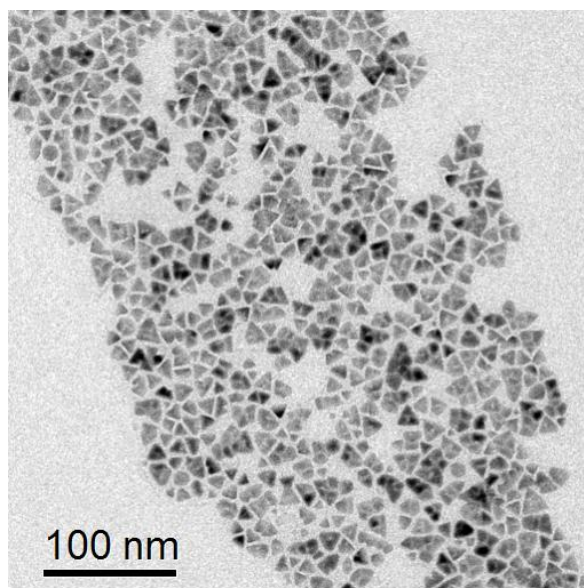

**Figure S3.** TEM micrograph of the cubic phase CdSe nanocrystals.

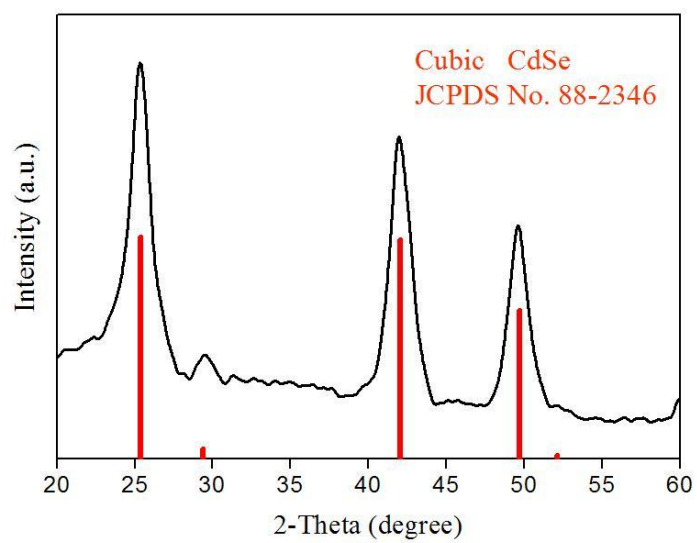

**Figure S4.** XRD pattern of the CdSe nanocrystals and standard data of cubic phase CdSe (JCPDS No. 88-2346).

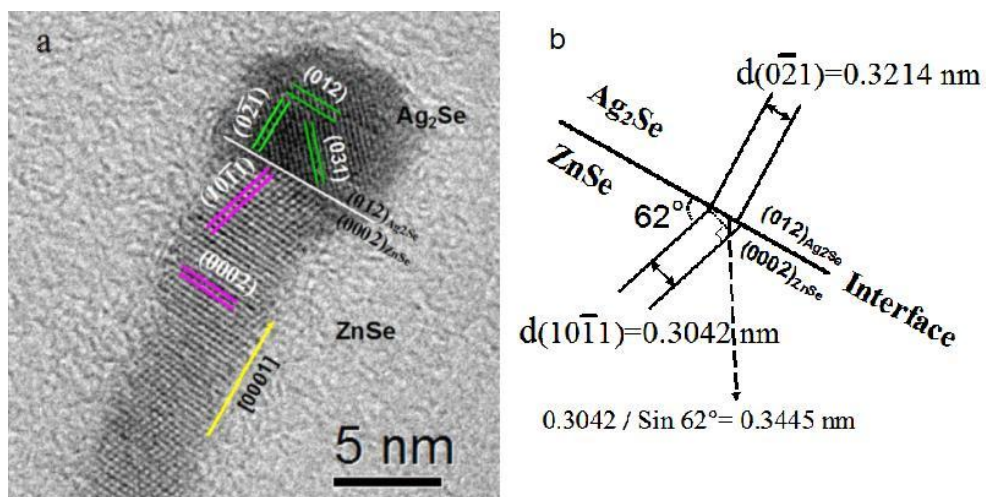

**Figure S5.** (a) HRTEM image of an individual Ag<sub>2</sub>Se-ZnSe nanoheterostructure; (b) schematical illustration of the calculation of the lattice mismatch between (021)<sub>Ag<sub>2</sub>Se</sub> and (1011)<sub>ZnSe</sub> at the interface.

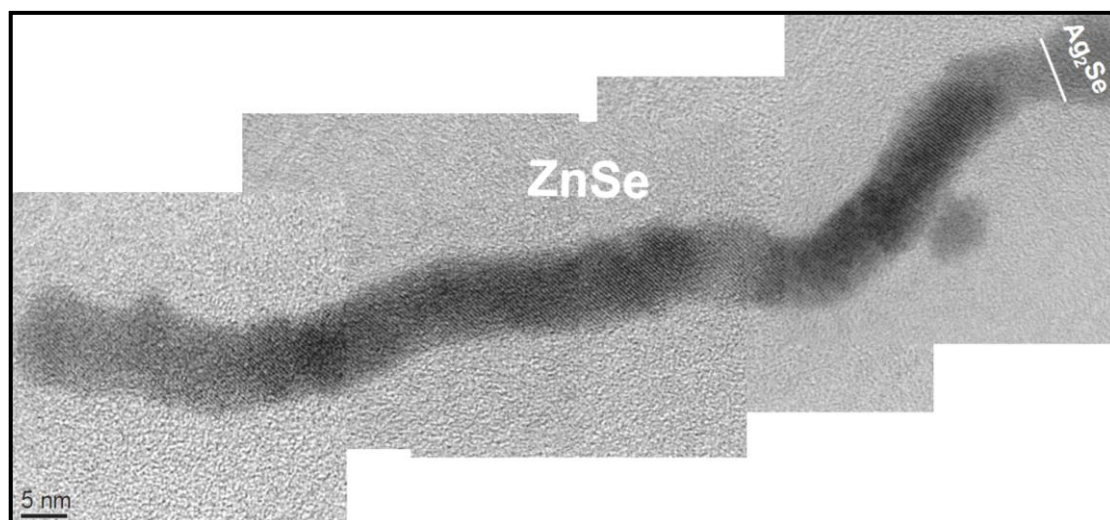

**Figure S6.** HRTEM image of an individual tortuous Ag<sub>2</sub>Se-ZnSe nanoheterostructure (spliced by five HRTEM images taken from different segments of the nanoheterostructure)

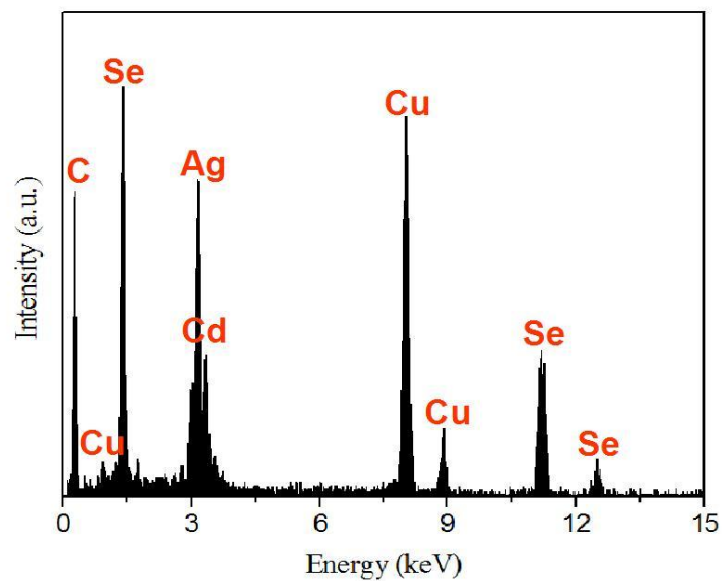

**Figure S7.** EDS spectrum from the  $\text{Ag}_2\text{Se}$ -CdSe region in an  $\text{Ag}_2\text{Se}$ -CdSe-ZnSe nanoheterostructure, showing the existence of Ag, Cd and Se.

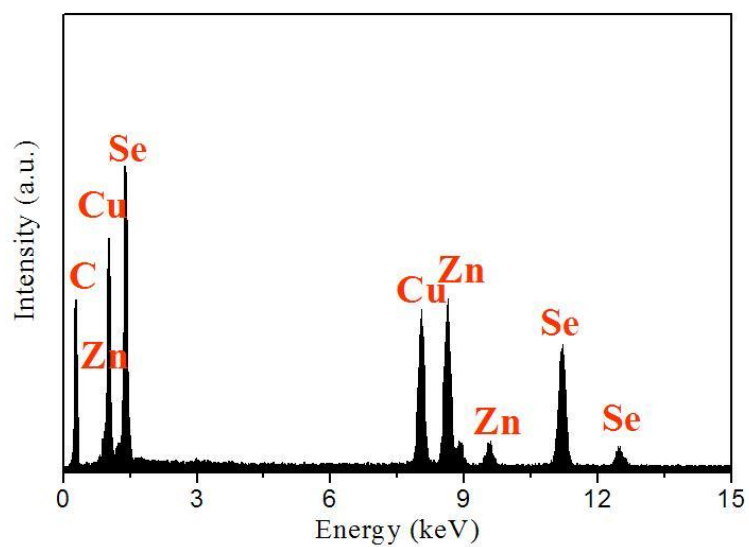

**Figure S8.** EDS spectrum from the ZnSe tail in an  $\text{Ag}_2\text{Se}$ -CdSe-ZnSe nanoheterostructure, showing the existence of Zn and Se.

**Table S1.** The calculated lattice mismatches of the possible plane-couplings for  $\text{Ag}_2\text{Se}$  and the second phase ( $\text{CdSe}$  or  $\text{ZnSe}$ ) in present work

|                              | $\text{CdSe}$ ( $10\bar{1}0$ ) | $\text{CdSe}$ (0002) | $\text{ZnSe}$ ( $10\bar{1}0$ ) | $\text{ZnSe}$ (0002) |
|------------------------------|--------------------------------|----------------------|--------------------------------|----------------------|
| $\text{Ag}_2\text{Se}$ (002) | 0.8%                           | 40.0%                | 8.5%                           | 36.2%                |
| $\text{Ag}_2\text{Se}$ (012) | 34.5%                          | 11.1%                | 39.5%                          | 6.7%                 |
